# Supplementary figures and images for: Phytochemical and Pharmacological Research of the American Cranberry (Oxycoccus macrocarpus (Ait.) Pursh) Leaves Extract and its Aminoacids Preparation with Hepatoprotective Activity
Source: Preprints.org preprint supplement (doi:10.20944/preprints202304.0609.v1), 2023-04-20

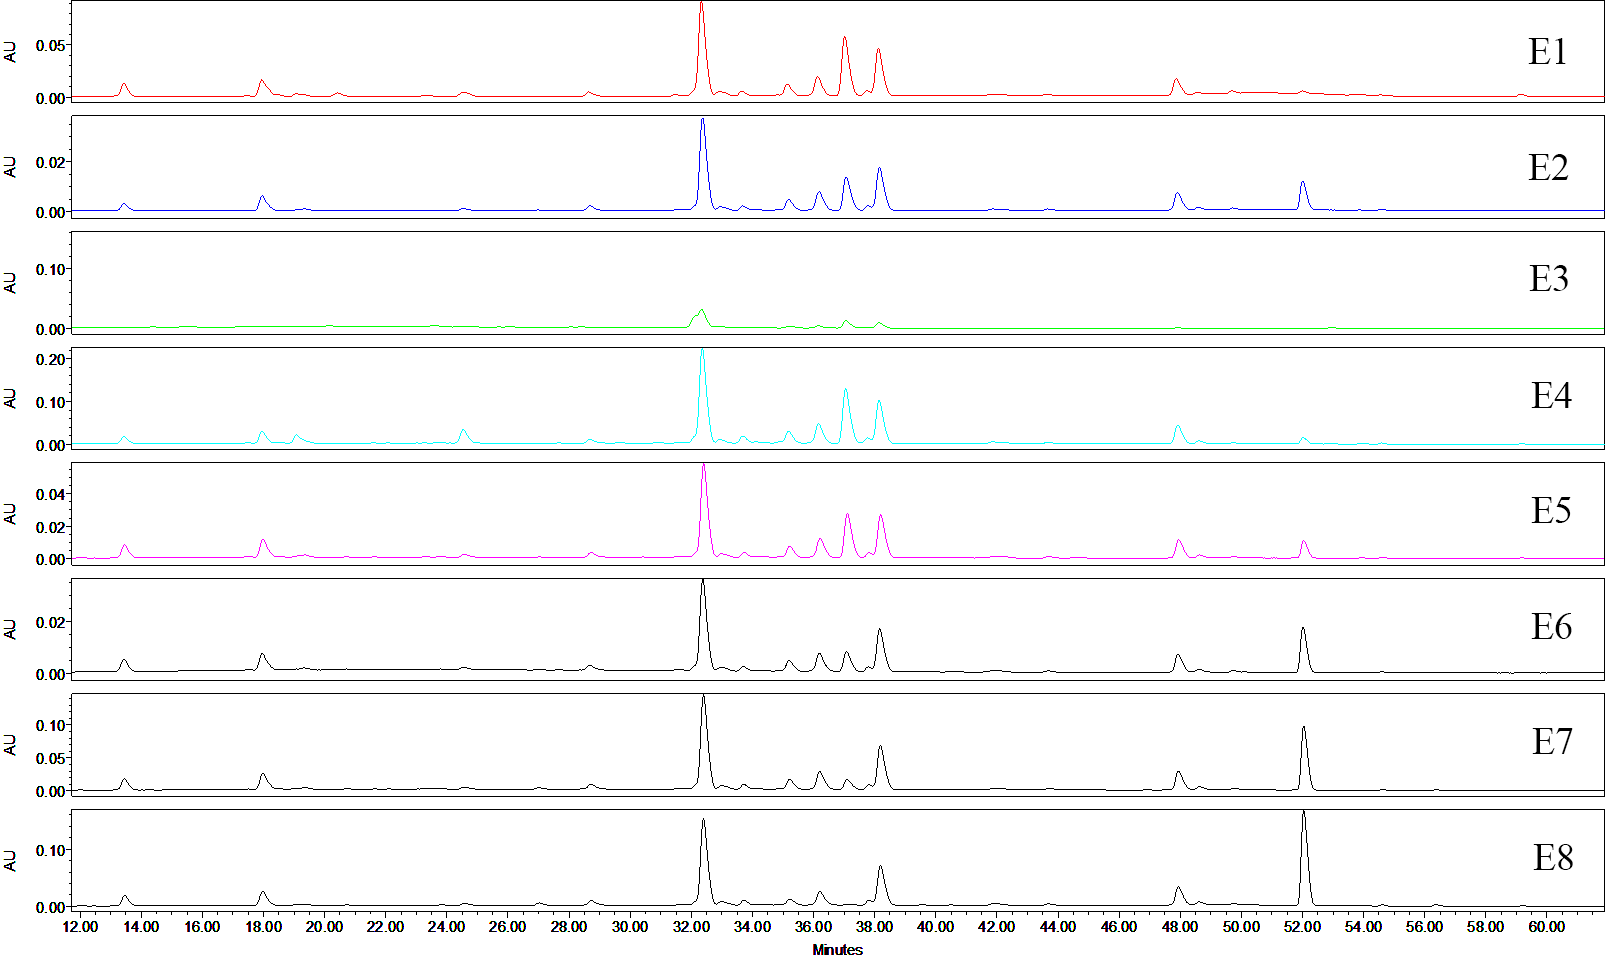


**Fig. S2.** Comparative HPLC-PDA profiles at 325 nm of different extracts.

Supplement: Supplementary file 1 [file supplementary]
